# Supplementary material for: A dual-signal amplification platform for sensitive fluorescence biosensing of leukemia-derived exosomes
Source: Royal Society of Chemistry journal article supplement (doi:10.1039/c8nr07720g), 2018-01-01
Supplement: c8nr07720g1.pdf [file c8nr07720g1.pdf]

## Supporting Information

### **A dual-signal amplification platform for sensitive fluorescence biosensing of leukemia-derived exosomes**

Lin Huang<sup>a</sup>, Dian-Bing Wang<sup>b</sup>, Netrapal Singh<sup>b,c</sup>, Fang Yang<sup>a</sup>, Ning Gu<sup>a,\*</sup>, Xian-En Zhang<sup>b,\*</sup>

<sup>a</sup>School of Biological Science and Medical Engineering, Southeast University, Nanjing 210096, PR China

<sup>b</sup>National Laboratory of Biomacromolecules, CAS center for Excellence in Biomacromolecules, Institute of Biophysics, Chinese Academy of Sciences, Beijing 100101, China

<sup>c</sup>Institute for Synthetic Biology Research, Shenzhen Institutes of Advanced Technology, Chinese Academy of Sciences, Shenzhen 518055, P.R. China

\*Corresponding authors

E-mail addresses: zhangxe@ibp.ac.cn (Xian-En Zhang), guning@seu.edu.cn (Ning Gu)

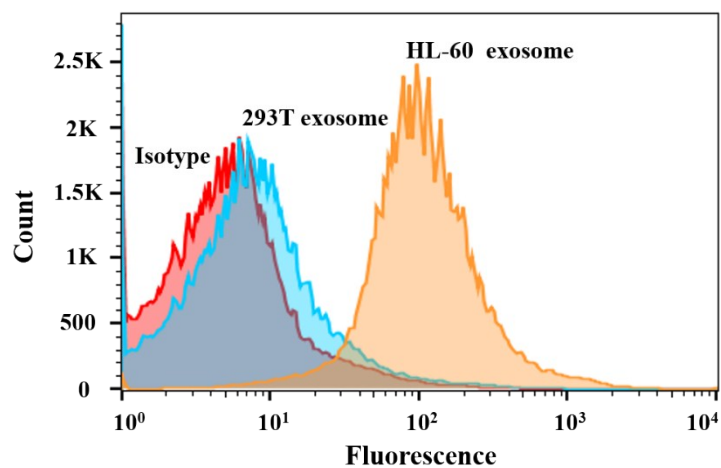

**Fig. S1** Flow cytometric analysis of different cell-derived exosomes with nucleolin marker.

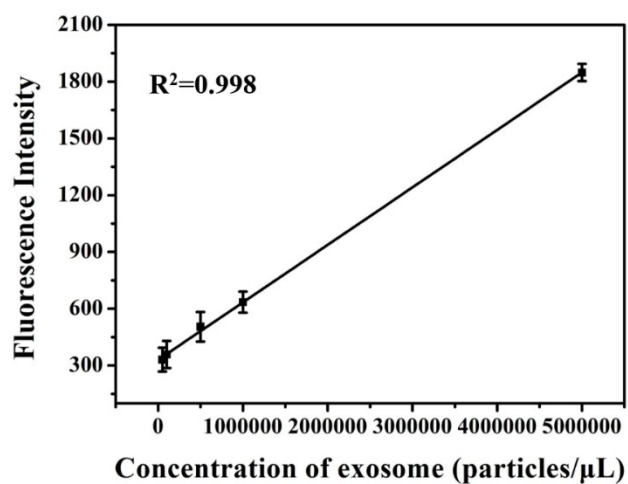

**Fig. S2** Standard curve of the fluorescence intensity (without nicking endonuclease-based amplification) versus the concentration of exosomes.
